1 **Title: *Drosophila* larval brain neoplasms present tumour-type dependent genome instability.**

2

3 Authors: Fabrizio Rossi,<sup>a</sup> Camille Stephan-Otto Attolini,<sup>a</sup> Jose Luis Mosquera,<sup>a</sup> and Cayetano Gonzalez.<sup>a,b</sup>

4

5 *Affiliation:*

6 <sup>a</sup> Institute for Research in Biomedicine (IRB Barcelona), The Barcelona Institute of Science and Technology,  
7 Baldiri Reixac, 10, 08028 Barcelona, Spain.

8 <sup>b</sup> Catalan Institution for Research and Advanced Studies (ICREA), Barcelona, Spain.

9

10

11

12 Corresponding author: Cayetano Gonzalez <[gonzalez@irbbarcelona.org](mailto:gonzalez@irbbarcelona.org)>

13

14

15

16 *Short title:* The genomic landscape of *Drosophila* brain tumours.

17

18

19 *Keywords:* drosophila cancer model, copy-number variation, single nucleotide polymorphism, genome  
20 instability, somatic mutation.

21

22

23

24

25

26

27 **ABSTRACT**

28 **Single nucleotide polymorphisms (SNPs) and copy number variants (CNVs) are found at different rates**  
29 **in human cancer. To determine if these genetic lesions appear in *Drosophila* tumours we have**  
30 **sequenced the genomes of 17 malignant neoplasms caused by mutations in *l(3)mbt*, *brat*, *aurA*, or *lgl*.**  
31 **We have found CNVs and SNPs in all the tumours. Tumour-linked CNVs range between 11 and 80 per**  
32 **sample, affecting between 92 and 1546 coding sequences. CNVs are in average less frequent in**  
33 ***l(3)mbt* than in *brat* lines. Nearly half of the CNVs fall within the 10 to 100Kb range, all tumour samples**  
34 **contain CNVs larger than 100 Kb and some have CNVs larger than 1Mb. The rates of tumour-linked**  
35 **SNPs change more than 20-fold depending on the tumour type: late stage *brat*, *l(3)mbt*, and *aurA* and**  
36 ***lgl* lines present median values of SNPs/Mb of exome of 0.16, 0.48, and 3.6, respectively. Higher SNP**  
37 **rates are mostly accounted for by C>A transversions, which likely reflect enhanced oxidative stress**  
38 **conditions in the affected tumours. Both CNVs and SNPs turn over rapidly. We found no evidence for**  
39 **selection of a gene signature affected by CNVs or SNPs in the cohort. Altogether, our results show**  
40 **that the rates of CNVs and SNPs, as well as the distribution of CNV sizes in this cohort of *Drosophila***  
41 **tumours are well within the range of those reported for human cancer. Genome instability is therefore**  
42 **inherent to *Drosophila* malignant neoplastic growth at a variable extent that is tumour type dependent.**

43

44 **AUTHOR SUMMARY**

45 *Drosophila* models of malignant growth can help to understand the molecular mechanisms of malignancy.  
46 These models are known to exhibit some of the hallmarks of cancer like sustained growth, immortality,  
47 metabolic reprogramming, and others. However, it is currently unclear if these fly models are affected by  
48 genome instability, which is another hallmark of many human malignant tumours. To address this issue we  
49 have sequenced and analysed the genomes of a cohort of seventeen fly tumour samples. We have found that  
50 genome instability is a common trait of *Drosophila* malignant tumours, which occurs at an extent that is tumour-  
51 type dependent, at rates that are similar to those of different human cancers.

52

53

54 **INTRODUCTION**

55

56 A wide range of tumour types can be experimentally induced in different organs in *Drosophila melanogaster* [1-  
57 6]. Many of these tumours are hyperplasias that present during larval development and eventually differentiate,  
58 but others behave as frankly malignant neoplasms that are refractory to differentiation signals, lethal to the host  
59 and immortal. The latter can be maintained through successive rounds of allograft in adult flies [7].

60

61 In humans, the study of mutational landscapes in thousands of tumours has generated a large catalogue of  
62 genomic lesions that appear during tumour development and are a driving force for malignant growth in  
63 different cancer types [8-13]. In *Drosophila*, the sequencing of a single tumour caused by the loss of  
64 Polyhomeotic (Ph) revealed that neither single nucleotide polymorphisms (SNPs) nor copy number variations  
65 (CNVs) were significantly increased in comparison with non-tumoural control tissue, suggesting that genome  
66 instability (GI) may not be a pre-requisite for neoplastic epithelial growth in this model system. [14]. The  
67 question remains, however, as to the extent of GI in other samples of Ph tumours and, indeed, in different  
68 types of *Drosophila* malignant neoplasms.

69

70 To address this question we have investigated the mutational landscape of a cohort of tumours caused by  
71 mutations in *l(3)malignant brain tumour* (*l(3)mbt*), *brain tumour* (*brat*), *aurora-A* (*aurA*), and *l(2)giant larvae*  
72 (*lgl*), which are some of the most aggressive and best characterised larval brain tumours that can be induced in  
73 *Drosophila* [15-20]. Although similar in appearance under the dissection microscope, these tumours develop  
74 through different oncogenic pathways and originate from different cell types. Mutants in *brat*, *aurA*, and *lgl*  
75 disrupt different aspects of the mechanisms of neuroblasts asymmetric division. The cell-of-origin of tumours  
76 caused by mutation in *brat* tumours is only the type II neuroblast, which resides in the dorsal side of the central  
77 brain [17], while *aurA* and *lgl* tumours originate from type I and II neuroblasts [16, 18-20]. Neoplastic growth in  
78 *l(3)mbt* tumours originate in the neuroepithelial regions of the larval brain lobes [19, 21] and is tightly linked to  
79 the ectopic expression in the soma of germline genes [22].

80

81 Altogether, we sequenced a total of 17 genomes corresponding to a combination of tumour types, lines of the  
82 same tumour type, lines from the same individual, and time points. Our results show that CNVs and SNPs

83 appear in *Drosophila* malignant neoplasms at a rate that is tumour-type dependent and within the range  
84 reported for human cancer.

85

86

## 87 **RESULTS/DISCUSSION**

88

89 To determine the extent of genome instability (GI) in *Drosophila* malignant neoplasms we generated a cohort  
90 from six different larval brain tumours including two *l(3)mbt* (mbtL1 and mbtL2), two *brat* (bratL1 and bratL2),  
91 one *aurA*, and one *lgl* (Fig. 1). Following allografts into adult hosts [7], gDNA samples were taken at T0 (first  
92 round of allograft), T5, and in some cases T10. One of the *l(3)mbt* tumour lines was split at T9 into two sub-  
93 lines that were cultured separately up to T10.

94

### 95 **CNVs are frequent in the *Drosophila* brain tumour cohort.**

96 To identify copy number variants (CNVs) that appear during tumour growth we compared the gDNA coverage  
97 from each tumour sample of the cohort to that of the larva in which each of these tumours originated. Based on  
98 the detection of Y chromosome-specific sequences and the ratio of X chromosome / autosomes coverage we  
99 concluded that that mbtL1, mbtL2, and *lgl* tumour lines originated from male larvae while *aur*, bratL1, and  
100 bratL2 originated from females (Fig. S1A). We could not sex the tumours before allografting because testis do  
101 not develop in some of these mutant larvae. Most (88%) of the identified CNVs correspond to gains clustered  
102 on heterochromatic and under-replicated euchromatic regions (URs), which are present in all lines from T0.  
103 These regions do not endoreplicate to the full extent that most of the genomic DNA does in polytene larval  
104 tissues [23-26] and therefore appear as copy number gains when the non-polytene tumour samples are  
105 compared to larval gDNA (Fig. S1B). Their detection provides a valuable internal control for our CNV calling  
106 method. Running the algorithm after filtering these regions out with a repeat mask generates the map revealing  
107 the actual extent of CNVs that arise during tumour development in our cohort (Table S1). A graphic summary of  
108 the map of gains ( $\geq +2$ , blue; +1, green) and losses (-1, red; -2, magenta) on each chromosome arm is shown in  
109 Fig. 2A. This final filtered map is not only a clean version of the unfiltered; it also includes new CNVs that can

110 only be identified thanks to the finer calibration of diploidy achieved by the algorithm following the removal of  
111 URs and heterochromatin.

112

113 We detected CNVs in all tumour samples at rates that range between 11 in mbtL2 T10A to 80 in bratL1 T10  
114 (Fig. 2A, B) with an average of  $37 \pm 20.5$ . Differences among tumour types are not major, but CNVs per genome  
115 are in average significantly fewer in *I(3)mbt* ( $20.1 \pm 9.6$ ) than in *brat* ( $56.2 \pm 17.3$ ;  $p=0.005$ ) lines. The average  
116 number of each CNVs class (-2, -1, +1, and  $\geq +2$ ) per genome in the entire cohort is  $2.8 \pm 4.8$ ,  $13.5 \pm 10.5$ ,  
117  $20.6 \pm 14$ , and  $0.2 \pm 0.7$ , respectively. The only cases of  $\geq +2$  were observed in the bratL1 line. Gains and losses  
118 of a single copy (Fig. 2B, classes +1 and -1; green and red, respectively) account for 92% of the found CNVs,  
119 with class +1 being more frequent in 65% of the samples. Amplifications are 1.3 times more abundant than  
120 deletions (354 and 277, respectively).

121

122 The four largest CNVs found in the cohort, much larger than all the rest, are one deletion and three duplications  
123 that, remarkably, fall in the same subdistal region in 3R and overlap extensively. The largest duplication was  
124 found in bratL2 T5 and spans 6.9 Mb on chromosome 3 (chr3R:20994001-27965000). This region (Fig. 2A,  
125 longest thick green segment) overlaps extensively with two adjacent duplications of 4.0Mb (chr3R:21317001-  
126 2539800) and 2.5 Mb (chr3R:25402001-27960000) that are found in both mbtL2 T10A and mbtL2 T10B. Owing  
127 to the low resolution of Fig. 2A, the two adjacent duplications appear as a single thick green segment in each  
128 tumour line. The large duplication in bratL2 T5 referred to above also overlaps over 1.1 Mb with the 4.1 Mb  
129 deletion (chr3R:17979001-22092000) observed in bratL1 T5, the largest deletion found in the cohort.

130

131 The rate of CNVs/Mb is slightly smaller in all chromosomes in male (range=0.08-0.37 CNVs/Mb) than in female  
132 (range= 0.15-0.57) tumour samples, but differences are poorly significant (Fig. 2C;  $p=0.055$ ). There are no  
133 significant differences in the rate of CNVs per Mb of euchromatin among chromosomes, except for the X  
134 chromosome in female samples ( $0.57 \pm 0.2$  CNVs/Mb) which is significantly higher than in the autosomes  
135 ( $p=0.0027$ ).

136

137 All tumour samples in the cohort present a nearly diploid balance of chromosome stoichiometry (i.e 1X, 1Y, 2A  
138 in males; 2X, 2A in females). Most of the Y chromosome cannot be quantified due to the abundance of low  
139 complexity sequences and transposable elements (TEs). However, in all tumour samples derived from male  
140 larvae the coverage of the repeat-free *kl-2* gene region is very close to half of the mean coverage of the major  
141 autosomes, regardless of the stage of tumour growth. This result strongly suggests that unlike male cell lines,  
142 which often lose the entire Y [27], this chromosome is efficiently maintained in *Drosophila* tumours. The Y  
143 chromosome encodes only a handful of genes, all of them male fertility factors with no known function in the  
144 soma and, indeed, X/O males are viable. However, the Y chromosome heterochromatin has a major impact on  
145 epigenetic variation and in modulating the expression of biologically relevant phenotypic variation [28].  
146 Similarly, unlike *Drosophila* cell lines where widespread loss or gain of the entire chromosome 4 has been  
147 reported [27], we have only observed three cases of large segmental aneuploidies for this chromosome in our  
148 entire cohort: a deletion (-1) uncovering 93% of the euchromatin and two duplications (+1) covering 79% and  
149 91% of the euchromatin of chromosome 4, respectively. As in many types of human cancer, karyotype changes  
150 have been observed in allografts from various larval brain tumours [29]. In flies, these changes do not appear  
151 to be sufficient to drive tumourigenesis [30, 31], but it is not known if they are involved in tumour progression.  
152 Our results suggest that specific aneuploid combinations are not selected during tumour progression.

153

#### 154 **CNVs in tumour samples are larger than those found in *Drosophila* cell lines, and turn over rapidly.**

155 CNV size distribution is highly skewed and notably different between duplications and deletions (Fig. 3A).  
156 Nearly half of the CNVs (49% of duplications and 47% of deficiencies) fall within the 10 to 100Kb range, but for  
157 those <10Kb, deletions and duplications account for 47% and 12% of the total, while in the >100Kb range the  
158 corresponding figures are 6% and 39% respectively. Indeed, most (85%, n=20) of the largest CNVs ( $\geq 500$ Kb)  
159 are amplifications that appeared at or after T5 (Table S1).

160

161 The total length of genomic sequences affected by gains in each tumour sample is quite significant, ranging  
162 between 180 Kb and 9.5 Mb. All but one of the 17 samples are affected by duplications covering more than 0.5  
163 Mb. Deletions cover smaller, but still significant regions ranging from 60 Kb to 5.1 Mb. 15 out of 17 samples  
164 present deletions covering more than 100 Kb (Fig. 3B). Genomic sequence length correlates tightly with the

165 number of coding sequences affected by copy number variation (Fig. 3B). In the entire cohort the number of  
166 genes affected by duplications or deletions range from 40 to 1404 and 9 to 773, respectively. In 11 out of the  
167 total 17 samples, duplications affect more than 100 genes and deletions affect more than 30 (Fig. 3B).

168

169 Enrichment analysis of the genes duplicated in at least one sample and not deleted in any, shows only  
170 proteinaceous extracellular matrix (GO:0005578) as significantly overrepresented, and no GO term was found  
171 to be under-represented (Table S2). Proteinaceous extracellular matrix is part of the GO term extracellular  
172 region (GO:0005576) that was found to be overrepresented in wild type strains [32]. Enrichment analysis of the  
173 genes deleted in at least one sample and not duplicated in any shows that the terms nucleosome assembly  
174 (GO:0006334), nuclear nucleosome (GO:0000788), and DNA-templated transcription initiation (GO:0006352),  
175 are significantly overrepresented, and no GO term was found to be under-represented (Table S2). However,  
176 "nuclear function", which includes nuclear nucleosome and nucleosome assembly was found to be under-  
177 represented in duplicated fragments in wild type strains [32].

178

179 The range of CNV sizes found in the tumour cohort is similar to those reported in Drosophila cell lines, and  
180 much larger than those found in wild type natural population and laboratory-adapted strains where 95% of the  
181 variants are shorter than 5 Kb and the largest duplicated and deleted regions are only 12 kb and 33 kb long,  
182 respectively [32-35]. Moreover, unlike Drosophila strains where CNVs affect more frequently regions that do  
183 not contain coding sequences [32] [33], 97% of the CNVs found in our tumour cohort affect coding sequences.  
184 The range of CNVs length in our tumour cohort is also much larger than those found in a Drosophila epithelial  
185 tumour caused by the loss of polyhomeotic (ph) [14] and similar to the 0.5 kb – 85 Mb range found in human  
186 cancer [36].

187

188 To get an estimate of the rate of turnover of CNVs, we plotted those that appear at any given T together with  
189 those that overlap in at least 1 Kb with CNVs found at the previous time point (Fig. 3C). New variants, both  
190 amplifications and deletions, appear at each time point, but are diluted at a greater or lesser extent at later  
191 stages of tumour growth: the fraction of duplication and deletions passed on from T0 to T10 is within the 5 to  
192 70% range, with no major differences between deficiencies and duplications. More than a third of the total

193 number of CNVs found at any given T were not present at earlier time points. An interesting case reflecting the  
194 rate of CNV turnover is that of the pair mbtL2 T10A and T10B. These two samples, which were originated by  
195 splitting the mbtL2 line at T9, contained 11 and 12 CNVs respectively of which 8 were common to both lines,  
196 thus illustrating a case in which CNVs arise in a single round of transplantation. In total, deficiencies and  
197 duplications inherited from T0 account for 7 and 14% of those present at the last round of allograft,  
198 respectively.

199  
200 Three main conclusions can be derived from our results. Firstly, compared to those reported in *Drosophila* wild  
201 type strains, CNVs in our tumour cohort are much more abundant and larger and appear much faster, over a  
202 period of weeks rather than years. Such a high rate of interstitial aneuploidy strongly suggests that one or more  
203 of the pathways that prevent the formation of interstitial aneuploidies are significantly compromised in these  
204 tumours, more in *brat* than in *l(3)mbt*. Secondly, neither number nor size distribution appear to correlate with  
205 the stage of tumour growth. This observation strongly argues that the cause of the GI that originates CNVs is  
206 concomitant with the onset of neoplastic malignant growth. Finally, their rather random distribution among  
207 tumour types and rounds of allografting, rapid turn over, and absence of hotspots shared among different lines  
208 suggest that CNVs behave like passengers rather than drivers in these tumours.

209

#### 210 **SNPs rates are tumour-type and tumour-age dependent.**

211 We used MuTect to call somatic nucleotide polymorphisms (SNPs) between each tumour sample and the non-  
212 tumoural tissues of the corresponding larvae (Fig. 4A; Table S3). SNPs in TEs or low complexity sequences  
213 were not taken into consideration for further analysis. We found SNPs in all tumour samples, at rates that are  
214 tumour type and tumour age-dependent. Total SNP numbers at T0 range between 27 and 76 among all tumour  
215 lines and remain unchanged at later time points in the two *brat* lines (range=26-57). However, SNP burden  
216 increases to a range between 95 and 218 in the *l(3)mbt* lines and even more, up to 8-fold compared to T0, in  
217 the *aurA* and *Igl* lines (range=385-476)(Fig. 4B). A previous report carried out by comparing tumour and control  
218 tissue to the *Drosophila* reference genome found no evidence of tumour-linked SNPs in one sample of  
219 allografted Ph tumour at T4 [14]. Using our own SNP calling strategy to directly compare the published tumour



220 and control gDNA sequence we identify 20 tumour-linked SNPs, which is similar to the rate that we have found  
221 in the *brat* lines, the ones with the smallest number of SNPs within our cohort.

222

223 Most of the differences in the total number of SNPs among the tumour samples of our cohort are accounted for  
224 by C>A (G>T) transversions (Fig. 4B, pale blue) to the extent that such differences among tumour lines at late  
225 time points become not significant if these two types of SNPs are removed. Indeed, the increase of C>A  
226 transversions becomes particularly notorious at later time points in *aurA* and *lgl* tumour lines where they  
227 account for more than 88% of all SNPs (Table S3). Importantly, applying the method described by Costello et  
228 al. [37], we were able to discard the possible artifactual origin (i.e. DNA oxidation during the processing of the  
229 DNA samples) of the C>A mutations that we have observed. C>A (G>T) transversions are commonly produced  
230 by the formation of apurinic (abasic) sites or 8-hydroxy-2'-deoxyguanosine (8-oxo-dG) that result from  
231 superoxide anions reacting with deoxyguanosine [38] [39]. Because our sequencing data shows no evidence of  
232 mutants in genes involved in the removal of superoxide anions or 8-oxo-dG like Sod2 [40], dOgg1 and  
233 Ribosomal protein S3 (RpS3) [41], or "DNA-(apurinic or apyrimidinic site) lyase activity", we hypothesize that  
234 the observed increase in C>A transversion may derive from tumour-type specific differences in metabolic  
235 activity and the consequent changes in oxidative stress levels.

236

237 The SNPs found in our cohort are scattered over the chromosomes and, unlike CNVs, they are not more  
238 frequent in the X chromosome than in the autosomes (Fig. 4A, C). The lower rate of mean SNPs/Mb in all  
239 chromosomes in female samples may simply reflect the fact that the *bratL1* and *bratL2* lines, which present the  
240 lowest incidence of SNPs, are female and account for most (5/7) of the female samples of the cohort. By  
241 analysing groups of SNPs separated by at most 50Kb we identified 96 regions where SNPs appear to be  
242 significantly ( $p \leq 0.001$ ) clustered in each tumour line (Table S4). However, none of our tumour samples showed  
243 any evidence of a "mutator phenotype" following [42]. The longest consecutive series of such clusters (about  
244 400 Kb) maps to a chromosomal region that presents overall enrichment of SNPs, and that spans 3Mb in 3R.  
245 17% (23/134) and 15% (22/151) of the SNPs found in the *mbtL2* T10A and T10B lines, respectively, fall within  
246 this region, a highly significantly ( $p \leq 1 \times 10^{-12}$ ) increase compared to the 2% expected if SNPs were randomly  
247 distributed along the third chromosome.

248

249 **SNPs rates in *Drosophila* brain tumours are within the range reported for human tumours.**

250 To compare the rate of SNPs in our tumour cohort to those reported for human tumours [43] we determined the  
251 frequency of the various types of SNPs classified by their localisation in the corresponding gene and deduced  
252 the rate of SNPs per Mb in the fraction of the exome that is sufficiently covered for significant SNP calling,  
253 considering only those SNPs with a minimum alternative allele frequency of 0.1 (Table S6). For tumour lines  
254 with more than 100 SNPs, the fraction of SNPs falling in the exome ranges between 15 and 34% of which more  
255 than 60% affect protein sequence. The corresponding percentages are not significant in the lines that present  
256 fewer than 100 SNPs. Mean SNPs rate in *brat* tumours (0.16 SNP/Mb of exome) is close to that of the human  
257 tumours with the lowest rate of SNPs, like rhabdoid tumour (Fig. 5). Mean SNPs rate in *l(3)mbt* tumours (0.48  
258 SNP/Mb of exome) is within the range of pediatric medulloblastoma and neuroblastoma. Finally, the rates of  
259 SNPs in the exome in *aurA* and *lgl* (3.6 SNP/Mb of exome) fall among those of human tumours with a medium-  
260 high rate of SNPs, like glioblastoma multiforme, and colorectal cancers (Fig. 5).

261

262 Malignancy traits are known to worsen over time in the tumours of our cohort: the later the round of  
263 implantation the higher the percentage of allografts that develop as tumours, and the shorter the life  
264 expectancy of implanted hosts [29, 30]. This observation strongly suggest the acquisition of driver mutations as  
265 tumours age. Such is the case in many human cancer types [9] [44] as well as in established *Drosophila* cell  
266 lines which acquire pro-proliferation and anti-apoptotic mutations [27]. However, we have found no genes  
267 mutated in more than one tumour line, not even among those with the highest rates of SNPs. Moreover, the  
268 fraction of SNPs that are passed on to later time points is very small ranging between 9 and 24 from T0 to T5  
269 and between 0 and 8 from T5 to T10 (Table S6). Thus, for instance, only 3% of the 476 SNPs found in *lgl* T5  
270 were passed on to *lgl* T10. Altogether, these results do not support the presence of driver mutations in the  
271 cohort that we have analysed. The point has to be made, however, that for detection of driver genes in human  
272 cancer, sample sizes are much larger than ours, in the order of hundreds per tumour type [45]. Therefore, the  
273 fact that our data does not reveal driver mutations in our cohort of *Drosophila* larval brain tumours does not rule  
274 out their existence.

275

276 In summary, we have found that *Drosophila* larval brain malignant neoplasms with diverse origin present  
277 different SNP burdens that are well within the range of SNPs rates reported for human cancer. The very low  
278 percentage of SNPs passed on to later time points and the absence of genes mutated in more than one line  
279 strongly argues that, like CNVs, tumour-linked SNPs are passenger mutant. The very predominant  
280 transvections are likely to result from enhanced oxidative stress conditions that are linked to tumour growth.

281

282

## 283 **MATERIALS AND METHODS**

284

### 285 **Fly strains .**

286 All fly stocks and crosses were maintained in standard food medium at 25°C unless otherwise specified. Flies  
287 carrying the following mutants and transgenes were used: *pUbiGFP-tub84B* and *pUbi-His2Av::EYFP* [46]  
288 *l(3)mbt<sup>Δs1</sup>* [47], *brat<sup>k06028</sup>* [48], *aurA<sup>8839</sup>* [16], *l(2)gf<sup>Δ</sup>* [19]. The genotypes of each of the tumour lines are as follows.  
289 Lines mbtL1 and mbtL2 : *Df(1)y-ac w<sup>1118</sup>*, *pUbi-His2Av::EYFP*, *pUbq-alpha-tub-84::GFP*; *l(3)mbt<sup>Δs1</sup>*. Lines bratL1  
290 and bratL2: *P{w<sup>+</sup>, lacW}brat<sup>k06028</sup>* (on a *w<sup>+</sup>* background). Line *lgl*: *l(2)gf<sup>Δ</sup>* Line *aurA* : *w<sup>1118</sup>*, *pUbi-His2Av::EYFP*,  
291 *pUbq-alpha-tub-84::GFP*; *aurA<sup>8839</sup>*. To generate *l(3)mbt* tumour larvae were raised at 29°C.

292

### 293 **Allografts and DNA isolations.**

294 Allografts were performed as previously described [7] with minor modifications. Single optic lobes from 3<sup>rd</sup>  
295 instar larvae were dissected and injected into the abdomen of *w<sup>1118</sup>* adult females. Flies were monitored daily  
296 and tumours were dissected out when they filled the abdomen of the host. Dissected tumours were  
297 resuspended in 100µl of PBS. An aliquot of 5µl of the tumour cell suspension was re-implanted in a new host  
298 and the remaining 95µl were processed for DNA isolation by standard lysis-ethanol precipitation, RNase  
299 treatment, and beads-purification (Agencourt AMPure XP, Beckman Coulter). DNA from non-tumour larval  
300 tissues was isolated following the same protocol.

301

### 302 **Pair-end DNA sequencing.**

303 DNA samples from tumours and their relative controls were processed in parallel. Genomic DNA of each  
304 sample was extracted and then fragmented randomly by sonication. After electrophoresis, DNA fragments of  
305 about 150-300 bp were purified. Adapter ligation and DNA cluster preparation are performed by Illumina  
306 Nextera DNA Sample Preparation KIT (Illumina), and tumour and non-tumoural controls were sequenced in  
307 parallel by Illumina HiSeq2000. We performed read quality control using the FastQC software  
308 (<http://www.bioinformatics.babraham.ac.uk/projects/fastqc>). All samples passed minimum quality requirements.

309

#### 310 **Alignment and coverage computation and correction (for CNV analyses).**

311 100 bp paired end reads were aligned to the dm6 Drosophila genome version using the STAR aligner [49] with  
312 default parameters. Each chromosome was binned into 1000bp segments for which mean coverage was  
313 computed using the IGVtools software [50]. We detected uneven coverage for regions with different GC content  
314 levels. In order to correct for this bias we fitted a generalized linear model using the Tweedie family with  
315 parameter 1.5 and log link function as implemented in the “gam” function from the R statistical language  
316 package “mgcv”. Residuals were used for all subsequent calculations.

317

#### 318 **Filtering, normalization, segmentation and CNV calling.**

319 We downloaded mappability information for the dm3 genome version from and converted coordinates to the  
320 dm6 version using the liftOver tool in [51]. Mean GC content was computed for each 1kb bin from the dm6  
321 genome version.

322

323 Bins with mappability values of 0 and GC content below the lower .08 quantile were removed from the analysis.  
324 Corrected and filtered coverage was quantile normalized for all samples using the function  
325 “normalize.quantiles” from the “preprocessCore” R package. Genome segmentation was performed according  
326 to [52] using the “segment” function as implemented in the “DNACopy” R package “CGHcall”. Segmentation and  
327 all subsequent steps were performed for each tumour type independently. For each comparison of interest, the  
328 ratio was computed between the sample and its corresponding control. Ratios were further normalized using  
329 the “normalize” function from the same package. p-value cutoff was set to 0.01 and a minimum of 3 standard  
330 deviations between segments. Segment means were normalized using the “postsegnormalize” function. We

331 used the “CGHcall” function from the “CGHcall” package to classify segments into double deletion, single  
332 deletion, diploid, single amplification and high amplification. Default parameters were used throughout the  
333 analysis.

334

335 Gene annotation was performed using the “biomaRt” R package [53] version from May 2015.

336

337 In order to obtain CNVs outside of URs we removed bins overlapping with these regions and repeated the  
338 segmentation step and CNV calling. Repeat masker regions were downloaded from UCSC for *Drosophila*  
339 *melanogaster* dm6 version. Under-replicated regions were obtained from [23].

340

#### 341 **Alignment and read processing for SNP calling.**

342 Reads were aligned to the dm6 version of the *Drosophila* genome using the BWA software version 0.7.6A [54]  
343 with default parameters. The resulting output was converted to the bam format and sorted using samtools  
344 version 0.1.19 [55]. We then proceeded to process the data with the software package GATK version 2.5-2 [56]  
345 according to their recommended best practices and with default parameters. We used a database of known  
346 SNPs downloaded from [http://e68.ensembl.org/Drosophila\\_melanogaster](http://e68.ensembl.org/Drosophila_melanogaster) corresponding to the dm3 genome  
347 version and converted to the dm6 version using the liftOver tool. Each sample was pre-processed according to  
348 the following steps: removal of duplicates using picard version 1.92; realignment of reads around indels using  
349 the GATK package with functions RealignerTargetCreator and IndelRealigner; base recalibration with the SNP  
350 database mentioned above and the function BaseRecalibrator from GATK.

351

#### 352 **Somatic mutation calling.**

353 Preprocessed files were used as input for the muTect software version 1.1.4 [57] with default parameters. Each  
354 sample was paired with its corresponding control. Resulting somatic SNPs were annotated using the software  
355 SNPeff version 3.0 [58].

356

#### 357 **SNP clustering.**

358 We counted the number of SNPs in windows of 50KB around each SNP detected by our method. We then  
359 performed a binomial test assuming a constant probability of finding a SNP in every position of the genome.  
360 The total effective size was computed as the number of positions with sufficient information in order to call a  
361 SNP. The Mutect algorithm internally defines these positions.

362

### 363 **Gene Ontology Enrichment.**

364 Gene ontology enrichment analysis was performed at the Gene Onto Consortium Website  
365 (<http://geneontology.org>) querying the set of 1791 genes that are amplified in at least 1 sample and never  
366 deleted and the set of 1101 genes that are deleted in at least 1 sample and never amplified in our cohort. We  
367 compared our gene set to the GO cellular component and biological function complete Data Sets and using the  
368 Bonferroni correction for multiple testing.

369

### 370 **Statistical Analyses.**

371 Unless otherwise stated all statistical test in this study were calculated by the Mann-Whitney test.

372

## 373 **ACKNOWLEDGEMENTS**

374 We thank the Bloomington Drosophila Stock Centre for providing fly stocks and A. Duran for technical  
375 assistance. Research in our laboratory is supported by ERC AdG 2011 294603 Advanced Grant from the  
376 European Research Council; BFU2015-66304-P and Redes de Excelencia BFU2014-52125-REDT-CellSYS  
377 from the Spanish MINECO, Spain; and SGR Agaur 2014 100 from Generalitat de Catalunya, Spain.

378

379

## 380 **REFERENCES**

381

382 1. Sonoshita M, Cagan RL. Modeling Human Cancers in Drosophila. Current topics in developmental  
383 biology. 2017;121:287-309. Epub 2017/01/07. doi: 10.1016/bs.ctdb.2016.07.008. PubMed PMID: 28057303.

- 384 2. Tipping M, Perrimon N. *Drosophila* as a model for context-dependent tumorigenesis. *Journal of cellular*  
385 *physiology*. 2014;229(1):27-33. Epub 2013/07/10. doi: 10.1002/jcp.24427. PubMed PMID: 23836429; PubMed  
386 Central PMCID: PMC4034382.
- 387 3. Figueroa-Clavevega A, Bilder D. Malignant *Drosophila* Tumors Interrupt Insulin Signaling to Induce  
388 Cachexia-like Wasting. *Developmental cell*. 2015;33(1):47-55. Epub 2015/04/09. doi:  
389 10.1016/j.devcel.2015.03.001. PubMed PMID: 25850672; PubMed Central PMCID: PMC4390765.
- 390 4. Markstein M, Dettorre S, Cho J, Neumuller RA, Craig-Muller S, Perrimon N. Systematic screen of  
391 chemotherapeutics in *Drosophila* stem cell tumors. *Proceedings of the National Academy of Sciences of the*  
392 *United States of America*. 2014;111(12):4530-5. Epub 2014/03/13. doi: 10.1073/pnas.1401160111. PubMed  
393 PMID: 24616500; PubMed Central PMCID: PMC3970492.
- 394 5. Bangi E, Murgia C, Teague AG, Sansom OJ, Cagan RL. Functional exploration of colorectal cancer  
395 genomes using *Drosophila*. *Nature communications*. 2016;7:13615. Epub 2016/11/30. doi:  
396 10.1038/ncomms13615. PubMed PMID: 27897178; PubMed Central PMCID: PMC5141297.
- 397 6. Gonzalez C. *Drosophila melanogaster*: a model and a tool to investigate malignancy and identify new  
398 therapeutics. *Nature reviews Cancer*. 2013;13(3):172-83. Epub 2013/02/08. doi: 10.1038/nrc3461. PubMed  
399 PMID: 23388617.
- 400 7. Rossi F, Gonzalez C. Studying tumor growth in *Drosophila* using the tissue allograft method. *Nature*  
401 *protocols*. 2015;10(10):1525-34. Epub 2015/09/12. doi: 10.1038/nprot.2015.096. PubMed PMID: 26357008.
- 402 8. Stratton MR. Exploring the genomes of cancer cells: progress and promise. *Science*.  
403 2011;331(6024):1553-8. Epub 2011/03/26. doi: 10.1126/science.1204040. PubMed PMID: 21436442.
- 404 9. Vogelstein B, Papadopoulos N, Velculescu VE, Zhou S, Diaz LA, Jr., Kinzler KW. Cancer genome  
405 landscapes. *Science*. 2013;339(6127):1546-58. Epub 2013/03/30. doi: 10.1126/science.1235122. PubMed  
406 PMID: 23539594; PubMed Central PMCID: PMC3749880.
- 407 10. Redon R, Ishikawa S, Fitch KR, Feuk L, Perry GH, Andrews TD, et al. Global variation in copy number  
408 in the human genome. *Nature*. 2006;444(7118):444-54. Epub 2006/11/24. doi: 10.1038/nature05329. PubMed  
409 PMID: 17122850; PubMed Central PMCID: PMC2669898.

- 410 11. Zarrei M, MacDonald JR, Merico D, Scherer SW. A copy number variation map of the human genome.  
411 Nature reviews Genetics. 2015;16(3):172-83. Epub 2015/02/04. doi: 10.1038/nrg3871. PubMed PMID:  
412 25645873.
- 413 12. Sudmant PH, Rausch T, Gardner EJ, Handsaker RE, Abyzov A, Huddleston J, et al. An integrated map  
414 of structural variation in 2,504 human genomes. Nature. 2015;526(7571):75-81. Epub 2015/10/04. doi:  
415 10.1038/nature15394. PubMed PMID: 26432246; PubMed Central PMCID: PMC4617611.
- 416 13. Auton A, Brooks LD, Durbin RM, Garrison EP, Kang HM, Korbel JO, et al. A global reference for human  
417 genetic variation. Nature. 2015;526(7571):68-74. Epub 2015/10/04. doi: 10.1038/nature15393. PubMed PMID:  
418 26432245; PubMed Central PMCID: PMC4750478.
- 419 14. Sievers C, Comoglio F, Seimiya M, Merdes G, Paro R. A deterministic analysis of genome integrity  
420 during neoplastic growth in *Drosophila*. PLoS One. 2014;9(2):e87090. Epub 2014/02/12. doi:  
421 10.1371/journal.pone.0087090. PubMed PMID: 24516544; PubMed Central PMCID: PMC3916295.
- 422 15. Wright TR, Bewley GC, Sherald AF. The genetics of dopa decarboxylase in *Drosophila melanogaster*.  
423 II. Isolation and characterization of dopa-decarboxylase-deficient mutants and their relationship to the alpha-  
424 methyl-dopa-hypersensitive mutants. Genetics. 1976;84(2):287-310. Epub 1976/10/01. PubMed PMID:  
425 826448; PubMed Central PMCID: PMC1213577.
- 426 16. Lee CY, Andersen RO, Cabernard C, Manning L, Tran KD, Lanskey MJ, et al. *Drosophila* Aurora-A  
427 kinase inhibits neuroblast self-renewal by regulating aPKC/Numb cortical polarity and spindle orientation.  
428 Genes & development. 2006;20(24):3464-74. PubMed PMID: 17182871.
- 429 17. Bowman SK, Rolland V, Betschinger J, Kinsey KA, Emery G, Knoblich JA. The tumor suppressors Brat  
430 and Numb regulate transit-amplifying neuroblast lineages in *Drosophila*. Developmental cell. 2008;14(4):535-  
431 46. PubMed PMID: 18342578.
- 432 18. Wang H, Somers GW, Bashirullah A, Heberlein U, Yu F, Chia W. Aurora-A acts as a tumor suppressor  
433 and regulates self-renewal of *Drosophila* neuroblasts. Genes & development. 2006;20(24):3453-63. PubMed  
434 PMID: 17182870.
- 435 19. Gateff E. Malignant neoplasms of genetic origin in *Drosophila melanogaster*. Science. 1978;200:1448-  
436 59.



- 437 20. Humbert P, Russell S, Richardson H. Dlg, Scribble and Lgl in cell polarity, cell proliferation and cancer.  
438 BioEssays : news and reviews in molecular, cellular and developmental biology. 2003;25(6):542-53. Epub  
439 2003/05/27. doi: 10.1002/bies.10286. PubMed PMID: 12766944.
- 440 21. Richter C, Oktaba K, Steinmann J, Muller J, Knoblich JA. The tumour suppressor L(3)mbt inhibits  
441 neuroepithelial proliferation and acts on insulator elements. Nature cell biology. 2011;13(9):1029-39. Epub  
442 2011/08/23. doi: ncb2306 [pii]  
443 10.1038/ncb2306. PubMed PMID: 21857667; PubMed Central PMCID: PMC3173870.
- 444 22. Janic A, Mendizabal L, Llamazares S, Rossell D, Gonzalez C. Ectopic expression of germline genes  
445 drives malignant brain tumor growth in Drosophila. Science (New York, NY. 2010;330(6012):1824-7. Epub  
446 2011/01/06. doi: 10.1126/science.1195481. PubMed PMID: 21205669.
- 447 23. Yarosh W, Spradling AC. Incomplete replication generates somatic DNA alterations within Drosophila  
448 polytene salivary gland cells. Genes & development. 2014;28(16):1840-55. Epub 2014/08/17. doi:  
449 10.1101/gad.245811.114. PubMed PMID: 25128500; PubMed Central PMCID: PMC4197960.
- 450 24. Sher N, Bell GW, Li S, Nordman J, Eng T, Eaton ML, et al. Developmental control of gene copy number  
451 by repression of replication initiation and fork progression. Genome research. 2012;22(1):64-75. Epub  
452 2011/11/18. doi: 10.1101/gr.126003.111. PubMed PMID: 22090375; PubMed Central PMCID: PMC3246207.
- 453 25. Nordman J, Orr-Weaver TL. Regulation of DNA replication during development. Development.  
454 2012;139(3):455-64. Epub 2012/01/10. doi: 10.1242/dev.061838. PubMed PMID: 22223677; PubMed Central  
455 PMCID: PMC3252349.
- 456 26. Belyakin SN, Christophides GK, Alekseyenko AA, Kriventseva EV, Belyaeva ES, Nanayev RA, et al.  
457 Genomic analysis of Drosophila chromosome underreplication reveals a link between replication control and  
458 transcriptional territories. Proceedings of the National Academy of Sciences of the United States of America.  
459 2005;102(23):8269-74. Epub 2005/06/02. doi: 10.1073/pnas.0502702102. PubMed PMID: 15928082; PubMed  
460 Central PMCID: PMC1149430.
- 461 27. Lee H, McManus CJ, Cho DY, Eaton M, Renda F, Somma MP, et al. DNA copy number evolution in  
462 Drosophila cell lines. Genome biology. 2014;15(8):R70. Epub 2014/09/30. doi: 10.1186/gb-2014-15-8-r70.  
463 PubMed PMID: 25262759; PubMed Central PMCID: PMC4289277.

- 464 28. Lemos B, Branco AT, Hartl DL. Epigenetic effects of polymorphic Y chromosomes modulate chromatin  
465 components, immune response, and sexual conflict. *Proceedings of the National Academy of Sciences of the*  
466 *United States of America*. 2010;107(36):15826-31. Epub 2010/08/28. doi: 10.1073/pnas.1010383107. PubMed  
467 PMID: 20798037; PubMed Central PMCID: PMC2936610.
- 468 29. Caussinus E, Gonzalez C. Induction of tumor growth by altered stem-cell asymmetric division in  
469 *Drosophila melanogaster*. *Nature genetics*. 2005;37(10):1125-9. PubMed PMID: 16142234.
- 470 30. Castellanos E, Dominguez P, Gonzalez C. Centrosome dysfunction in *Drosophila* neural stem cells  
471 causes tumors that are not due to genome instability. *Curr Biol*. 2008;18(16):1209-14. PubMed PMID:  
472 18656356.
- 473 31. Dekanty A, Barrio L, Muzzopappa M, Auer H, Milan M. Aneuploidy-induced delaminating cells drive  
474 tumorigenesis in *Drosophila* epithelia. *Proceedings of the National Academy of Sciences of the United States of*  
475 *America*. 2012;109(50):20549-54. Epub 2012/11/28. doi: 10.1073/pnas.1206675109. PubMed PMID:  
476 23184991; PubMed Central PMCID: PMC3528526.
- 477 32. Dopman EB, Hartl DL. A portrait of copy-number polymorphism in *Drosophila melanogaster*.  
478 *Proceedings of the National Academy of Sciences of the United States of America*. 2007;104(50):19920-5.  
479 Epub 2007/12/07. doi: 10.1073/pnas.0709888104. PubMed PMID: 18056801; PubMed Central PMCID:  
480 PMC2148398.
- 481 33. Emerson JJ, Cardoso-Moreira M, Borevitz JO, Long M. Natural selection shapes genome-wide patterns  
482 of copy-number polymorphism in *Drosophila melanogaster*. *Science*. 2008;320(5883):1629-31. Epub  
483 2008/06/07. doi: 10.1126/science.1158078. PubMed PMID: 18535209.
- 484 34. Cardoso-Moreira M, Arguello JR, Clark AG. Mutation spectrum of *Drosophila* CNVs revealed by  
485 breakpoint sequencing. *Genome biology*. 2012;13(12):R119. Epub 2012/12/25. doi: 10.1186/gb-2012-13-12-  
486 r119. PubMed PMID: 23259534; PubMed Central PMCID: PMC4056370.
- 487 35. Gilks WP, Pennell TM, Flis I, Webster MT, Morrow EH. Whole genome resequencing of a laboratory-  
488 adapted *Drosophila melanogaster* population sample. *F1000Research*. 2016;5:2644. Epub 2017/01/20. doi:  
489 10.12688/f1000research.9912.3. PubMed PMID: 27928499; PubMed Central PMCID: PMC5115224.

- 490 36. Beroukhim R, Mermel CH, Porter D, Wei G, Raychaudhuri S, Donovan J, et al. The landscape of  
491 somatic copy-number alteration across human cancers. *Nature*. 2010;463(7283):899-905. Epub 2010/02/19.  
492 doi: 10.1038/nature08822. PubMed PMID: 20164920; PubMed Central PMCID: PMC2826709.
- 493 37. Costello M, Pugh TJ, Fennell TJ, Stewart C, Lichtenstein L, Meldrim JC, et al. Discovery and  
494 characterization of artifactual mutations in deep coverage targeted capture sequencing data due to oxidative  
495 DNA damage during sample preparation. *Nucleic acids research*. 2013;41(6):e67. Epub 2013/01/11. doi:  
496 10.1093/nar/gks1443. PubMed PMID: 23303777; PubMed Central PMCID: PMC3616734.
- 497 38. De Bont R, van Larebeke N. Endogenous DNA damage in humans: a review of quantitative data.  
498 *Mutagenesis*. 2004;19(3):169-85. Epub 2004/05/05. PubMed PMID: 15123782.
- 499 39. Mishra SK, Mishra PC. An ab initio theoretical study of electronic structure and properties of 2'-  
500 deoxyguanosine in gas phase and aqueous media. *Journal of computational chemistry*. 2002;23(5):530-40.  
501 Epub 2002/04/12. doi: 10.1002/jcc.10046. PubMed PMID: 11948579.
- 502 40. Kirby K, Hu J, Hilliker AJ, Phillips JP. RNA interference-mediated silencing of Sod2 in *Drosophila* leads  
503 to early adult-onset mortality and elevated endogenous oxidative stress. *Proceedings of the National Academy  
504 of Sciences of the United States of America*. 2002;99(25):16162-7. Epub 2002/11/29. doi:  
505 10.1073/pnas.252342899. PubMed PMID: 12456885; PubMed Central PMCID: PMC138582.
- 506 41. Dherin C, Dizdaroglu M, Doerflinger H, Boiteux S, Radicella JP. Repair of oxidative DNA damage in  
507 *Drosophila melanogaster*: identification and characterization of dOgg1, a second DNA glycosylase activity for  
508 8-hydroxyguanine and formamidopyrimidines. *Nucleic acids research*. 2000;28(23):4583-92. Epub 2000/11/30.  
509 PubMed PMID: 11095666; PubMed Central PMCID: PMC115177.
- 510 42. Tamborero D, Gonzalez-Perez A, Perez-Llamas C, Deu-Pons J, Kandoth C, Reimand J, et al.  
511 Comprehensive identification of mutational cancer driver genes across 12 tumor types. *Scientific reports*.  
512 2013;3:2650. Epub 2013/10/03. doi: 10.1038/srep02650. PubMed PMID: 24084849; PubMed Central PMCID:  
513 PMC3788361.
- 514 43. Lawrence MS, Stojanov P, Polak P, Kryukov GV, Cibulskis K, Sivachenko A, et al. Mutational  
515 heterogeneity in cancer and the search for new cancer-associated genes. *Nature*. 2013;499(7457):214-8. Epub  
516 2013/06/19. doi: 10.1038/nature12213. PubMed PMID: 23770567.

- 517 44. Stratton MR, Campbell PJ, Futreal PA. The cancer genome. *Nature*. 2009;458(7239):719-24. Epub  
518 2009/04/11. doi: 10.1038/nature07943. PubMed PMID: 19360079; PubMed Central PMCID: PMC2821689.
- 519 45. Gonzalez-Perez A, Perez-Llamas C, Deu-Pons J, Tamborero D, Schroeder MP, Jene-Sanz A, et al.  
520 IntOGen-mutations identifies cancer drivers across tumor types. *Nature methods*. 2013;10(11):1081-2. Epub  
521 2013/09/17. doi: 10.1038/nmeth.2642. PubMed PMID: 24037244.
- 522 46. Rebollo E, Llamazares S, Reina J, Gonzalez C. Contribution of noncentrosomal microtubules to spindle  
523 assembly in *Drosophila* spermatocytes. *PLoS biology*. 2004;2(1):E8. Epub 2004/02/06. doi:  
524 10.1371/journal.pbio.0020008. PubMed PMID: 14758368; PubMed Central PMCID: PMC317275.
- 525 47. Yohn CB, Pusateri L, Barbosa V, Lehmann R. I(3)malignant brain tumor and Three Novel Genes Are  
526 Required for *Drosophila* Germ-Cell Formation. *Genetics*. 2003;165:1889–900.
- 527 48. Spradling AC, Stern D, Beaton A, Rhem EJ, Lavery T, Mozden N, et al. The Berkeley *Drosophila*  
528 Genome Project Gene Disruption Project: Single P-Element Insertions Mutating 25% of Vital *Drosophila* Genes.  
529 *Genetics*. 1999;153:42.
- 530 49. Dobin A, Davis CA, Schlesinger F, Drenkow J, Zaleski C, Jha S, et al. STAR: ultrafast universal RNA-  
531 seq aligner. *Bioinformatics*. 2013;29(1):15-21. Epub 2012/10/30. doi: 10.1093/bioinformatics/bts635. PubMed  
532 PMID: 23104886; PubMed Central PMCID: PMC3530905.
- 533 50. Robinson JT, Thorvaldsdottir H, Winckler W, Guttman M, Lander ES, Getz G, et al. Integrative  
534 genomics viewer. *Nature biotechnology*. 2011;29(1):24-6. Epub 2011/01/12. doi: 10.1038/nbt.1754. PubMed  
535 PMID: 21221095; PubMed Central PMCID: PMC3346182.
- 536 51. Kent WJ, Sugnet CW, Furey TS, Roskin KM, Pringle TH, Zahler AM, et al. The human genome browser  
537 at UCSC. *Genome research*. 2002;12(6):996-1006. Epub 2002/06/05. doi: 10.1101/gr.229102. Article  
538 published online before print in May 2002. PubMed PMID: 12045153; PubMed Central PMCID: PMC186604.
- 539 52. Olshen AB, Venkatraman ES, Lucito R, Wigler M. Circular binary segmentation for the analysis of array-  
540 based DNA copy number data. *Biostatistics*. 2004;5(4):557-72. Epub 2004/10/12. doi:  
541 10.1093/biostatistics/kxh008. PubMed PMID: 15475419.
- 542 53. Durinck S, Spellman PT, Birney E, Huber W. Mapping identifiers for the integration of genomic datasets  
543 with the R/Bioconductor package biomaRt. *Nature protocols*. 2009;4(8):1184-91. Epub 2009/07/21. doi:  
544 10.1038/nprot.2009.97. PubMed PMID: 19617889; PubMed Central PMCID: PMC3159387.

- 545 54. Li H, Durbin R. Fast and accurate short read alignment with Burrows-Wheeler transform. *Bioinformatics*.  
546 2009;25(14):1754-60. Epub 2009/05/20. doi: 10.1093/bioinformatics/btp324. PubMed PMID: 19451168;  
547 PubMed Central PMCID: PMC2705234.
- 548 55. Li H, Handsaker B, Wysoker A, Fennell T, Ruan J, Homer N, et al. The Sequence Alignment/Map  
549 format and SAMtools. *Bioinformatics*. 2009;25(16):2078-9. Epub 2009/06/10. doi:  
550 10.1093/bioinformatics/btp352. PubMed PMID: 19505943; PubMed Central PMCID: PMC2723002.
- 551 56. DePristo MA, Banks E, Poplin R, Garimella KV, Maguire JR, Hartl C, et al. A framework for variation  
552 discovery and genotyping using next-generation DNA sequencing data. *Nature genetics*. 2011;43(5):491-8.  
553 Epub 2011/04/12. doi: 10.1038/ng.806. PubMed PMID: 21478889; PubMed Central PMCID: PMC3083463.
- 554 57. Cibulskis K, Lawrence MS, Carter SL, Sivachenko A, Jaffe D, Sougnez C, et al. Sensitive detection of  
555 somatic point mutations in impure and heterogeneous cancer samples. *Nature biotechnology*. 2013;31(3):213-  
556 9. Epub 2013/02/12. doi: 10.1038/nbt.2514. PubMed PMID: 23396013; PubMed Central PMCID: PMC3833702.
- 557 58. Cingolani P, Platts A, Wang le L, Coon M, Nguyen T, Wang L, et al. A program for annotating and  
558 predicting the effects of single nucleotide polymorphisms, SnpEff: SNPs in the genome of *Drosophila*  
559 *melanogaster* strain w1118; iso-2; iso-3. *Fly*. 2012;6(2):80-92. Epub 2012/06/26. doi: 10.4161/fly.19695.  
560 PubMed PMID: 22728672; PubMed Central PMCID: PMC3679285.

561

562

563

564

565

## 566 **FIGURE LEGENDS**

567

568 **Fig. 1. The *Drosophila* larval brain tumour cohort.** Larval brains tumours derived from two *l(3)mbt* (mbtL1  
569 and mbtL2), two *brat* (bratL1 and bratL2) one *aurA*, and one *lgl* individuals were dissected out from the donor  
570 larvae and allografted repeatedly, up to T5 for bratL2 and *aurA*, and up to T10 for mbtL1, mbtL2, bratL1, and  
571 *lgl*. Line mbtL2 was split at T9 to generate sublines mbtL2A and mbtL2B. Genomic DNA was obtained from all

572 tumour lines at T0, T5, and T10 if available, as well as from the non-tumoural tissues of the corresponding  
573 donor larvae.

574

575 **Fig. 2. Map and frequency of CNVs.** A) Map of the CNVs identified in different lines at different time points  
576 after filtering out under-replicated regions. Gains ( $\geq +2$ , blue;  $+1$ , green) and losses ( $-1$ , red; and  $\leq -2$ , purple) are  
577 mapped along chromosome arms X, 2L, 2R, 3L, 3R, and 4th. The heterochromatic Y chromosome is omitted.  
578 B) Barplot showing the total number of CNVs per genome per tumour sample and the relative contribution of  
579 each of the four CNV classes. C) Distribution of CNVs per Mb on each chromosome arm in female (blue) and  
580 male (red) samples. Error bars represent standard deviation.

581

582 **Fig. 3. Size distribution and turnover rate of CNVs.** A, B) Distribution of CNVs sizes among the samples of  
583 the cohort. Duplications and deletions are shown in blue and red, respectively. A shows a scattered plot of CNV  
584 sizes in base-pairs, in logarithmic scale. B shows the total number of Mb (upper side of the graph) and total  
585 coding sequences (lower side of the graph) affected by duplications and deletions. C) Plot of number of  
586 duplications (upper side of the graph) and deletions (lower side of the graph) that are passed on through  
587 successive rounds of allograft.

588

589 **Fig. 4. Map and frequency of SNPs.** A) The SNPs identified in different lines at different time points are  
590 mapped along chromosome arms X, 2L, 2R, 3L, 3R, and 4th. The heterochromatic Y chromosome is omitted.  
591 B) Barplot showing the total number of SNPs per genome per tumour sample and the relative contribution of  
592 each of the six possible base-pair substitutions. C) Distribution of SNPs per Mb on each chromosome arm in  
593 female (blue) and male (red) samples. Error bars represent standard deviation.

594

595 **Fig. 5. SNP rates of Drosophila larval brain tumours compared to the SNP rate spectrum of a selection  
596 of human cancers.** Scattered plot of the rates of SNPs/Mb of exome found in late stages (T5 and T10) of the  
597 Drosophila cohort (coloured) together with those from a selection of human cancer samples (grey circles;  
598 modified after [43].

599

600 **SUPPORTING INFORMATION LEGENDS**

601

602 **Fig. S1. Sequence coverage and first draft map of CNVs.** A) Overview of sequence coverage over the  
603 genome at the first round of allograft (T0). The halved coverage of the X chromosome compared to that of the  
604 autosome arms and the significant coverage of Y chromosome specific sequences in mtbtL1, mbtL2, and Igl  
605 indicates that these lines originated in male larvae. B) Map of CNVs identified in different lines at different time  
606 points. Copy number gains ( $\geq +2$ , blue; +1, green) and losses (-1, red; and  $\leq -2$ , purple) are mapped along  
607 chromosome arms X, 2L, 2R, 3L, 3R, and 4th. The heterochromatic Y chromosome is omitted. A very  
608 significant fraction of copy number gains map on under-replicated regions (URs and heterochromatin; shown in  
609 brown at the top of the map).

610

611 **Table S1.**

612 Catalogue of CNVs found in the cohort.

613

614 **Table S2.**

615 GO analyses of genes affected by CNVs.

616

617 **Table S3.**

618 Catalogue of SNPs found in the cohort.

619

620 **Table S4.**

621 SNP cluster analyses.

622

623 **Table S5.**

624 SNPs types found in the cohort.

625

626 **Table S6.**

627 Percentage SNPs passed on to later time points.

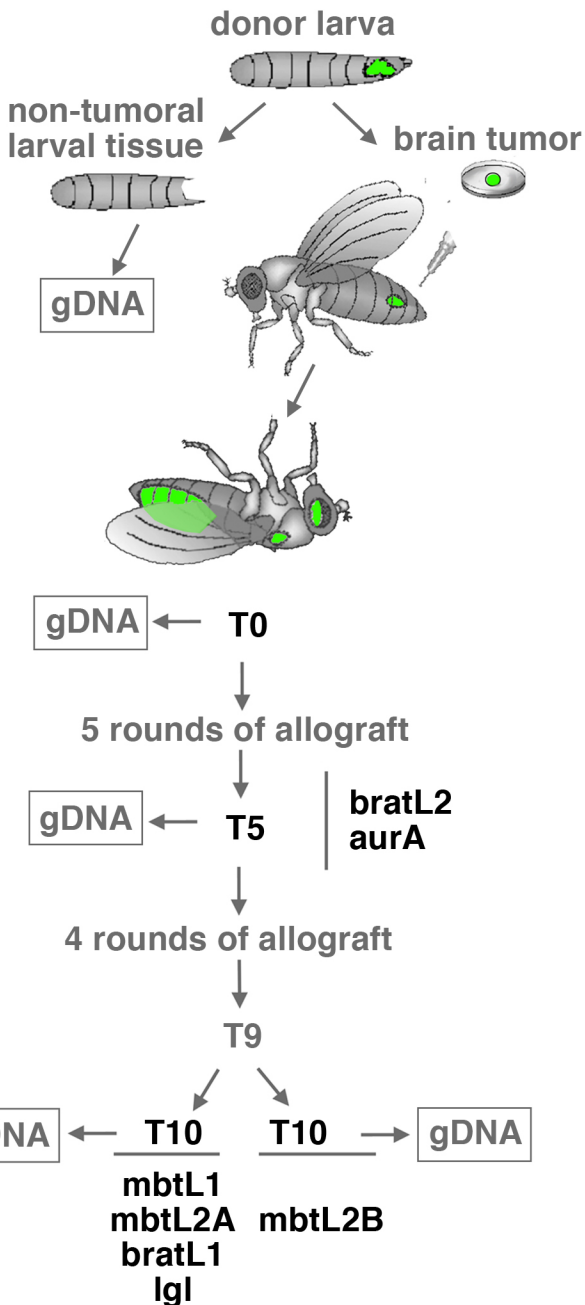

**FIGURE 1**



**A**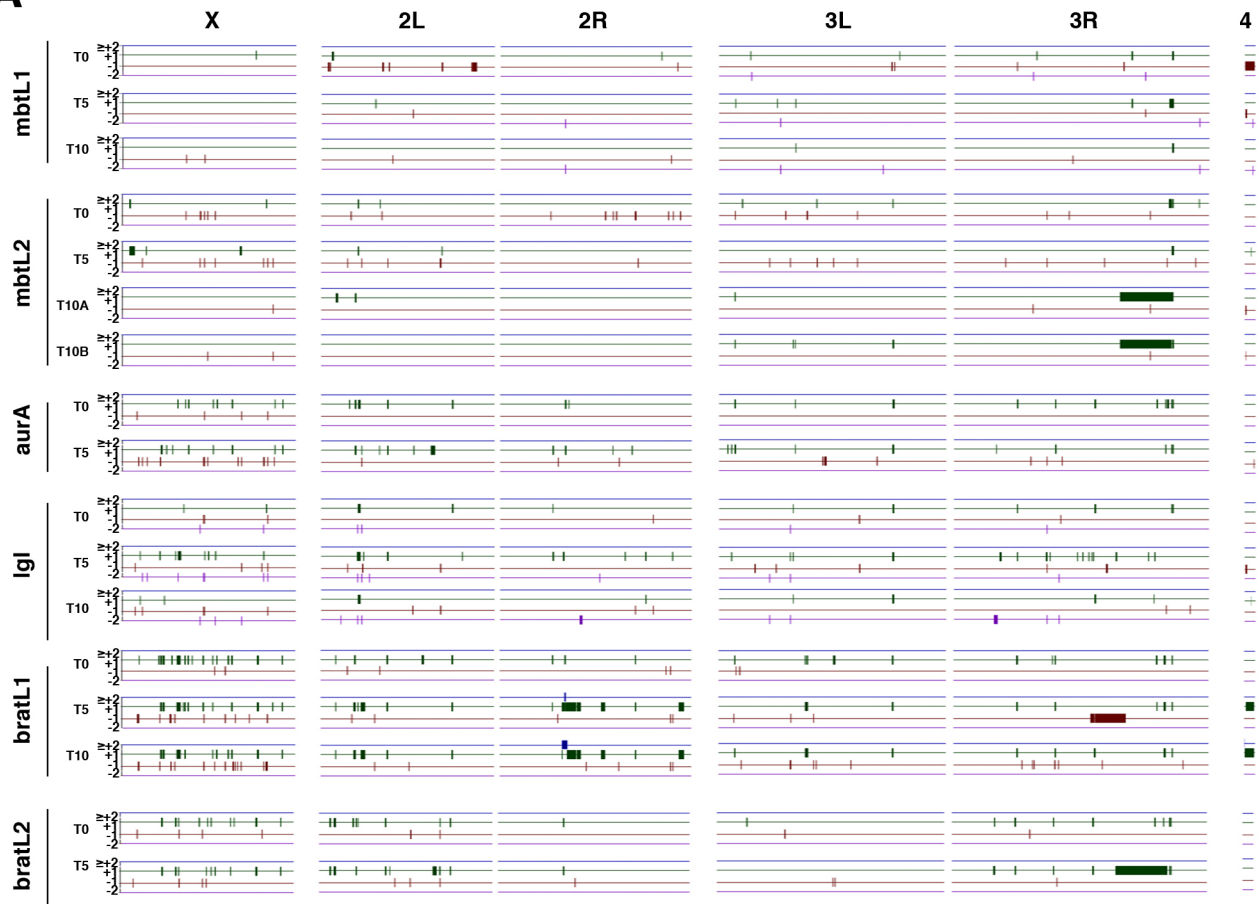**B**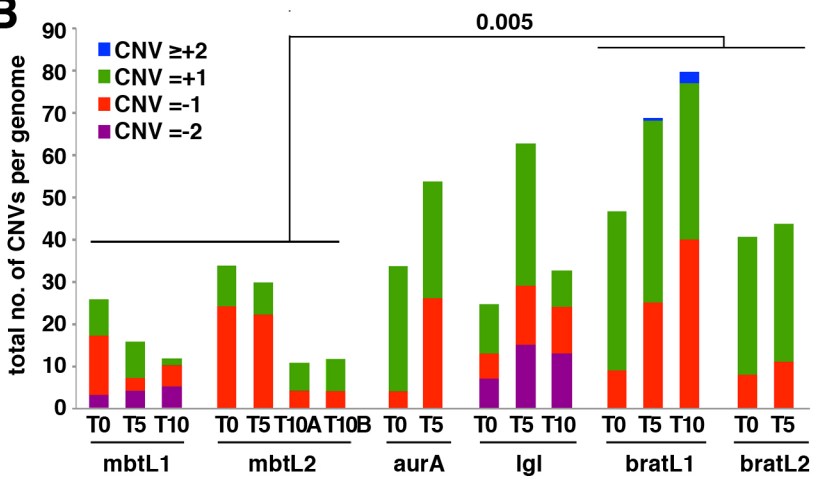**C**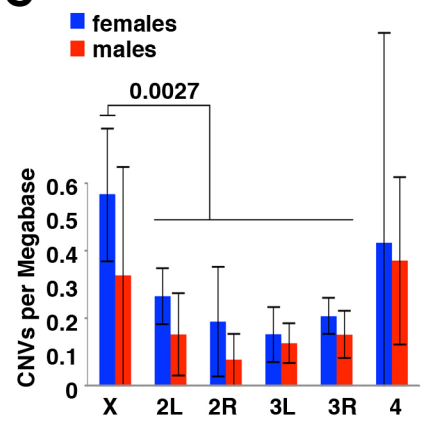**FIGURE 2**

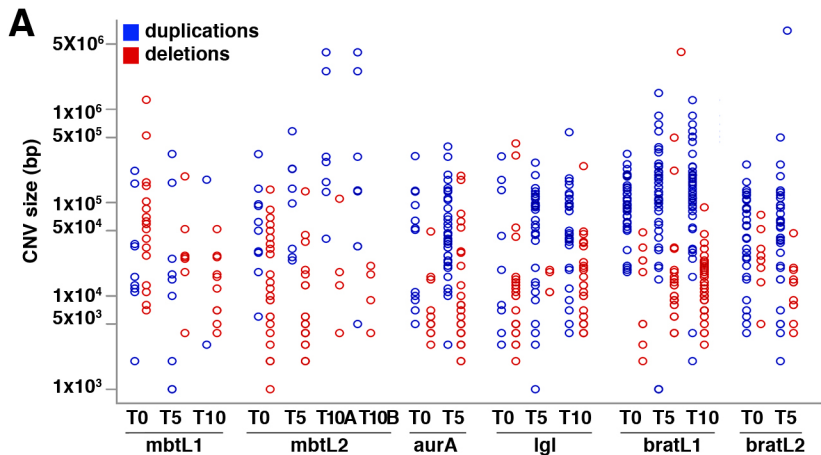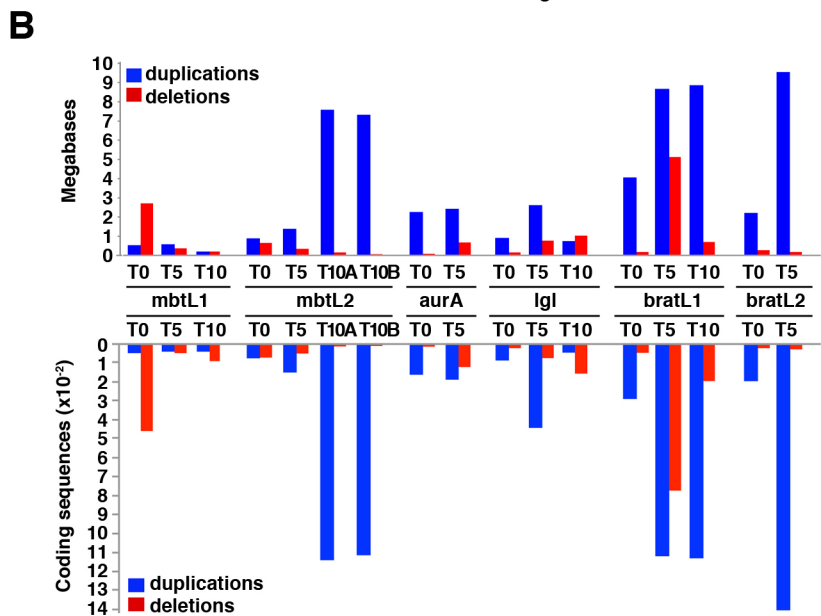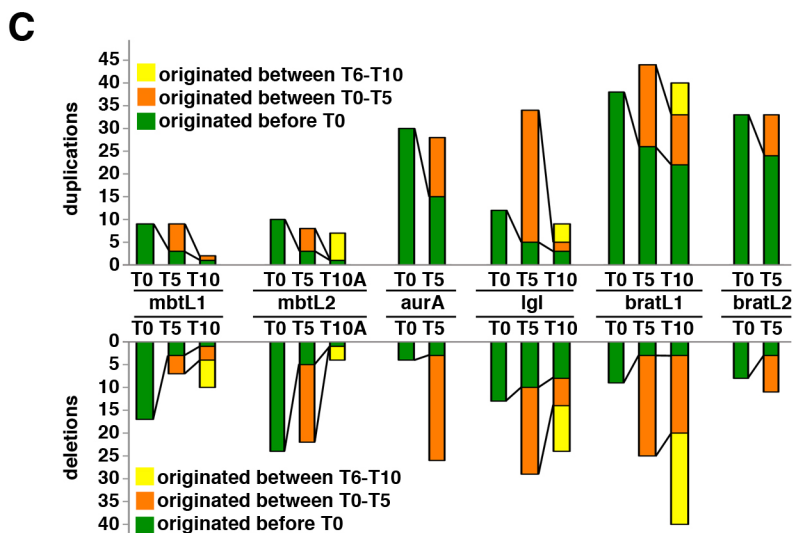

**FIGURE 3**

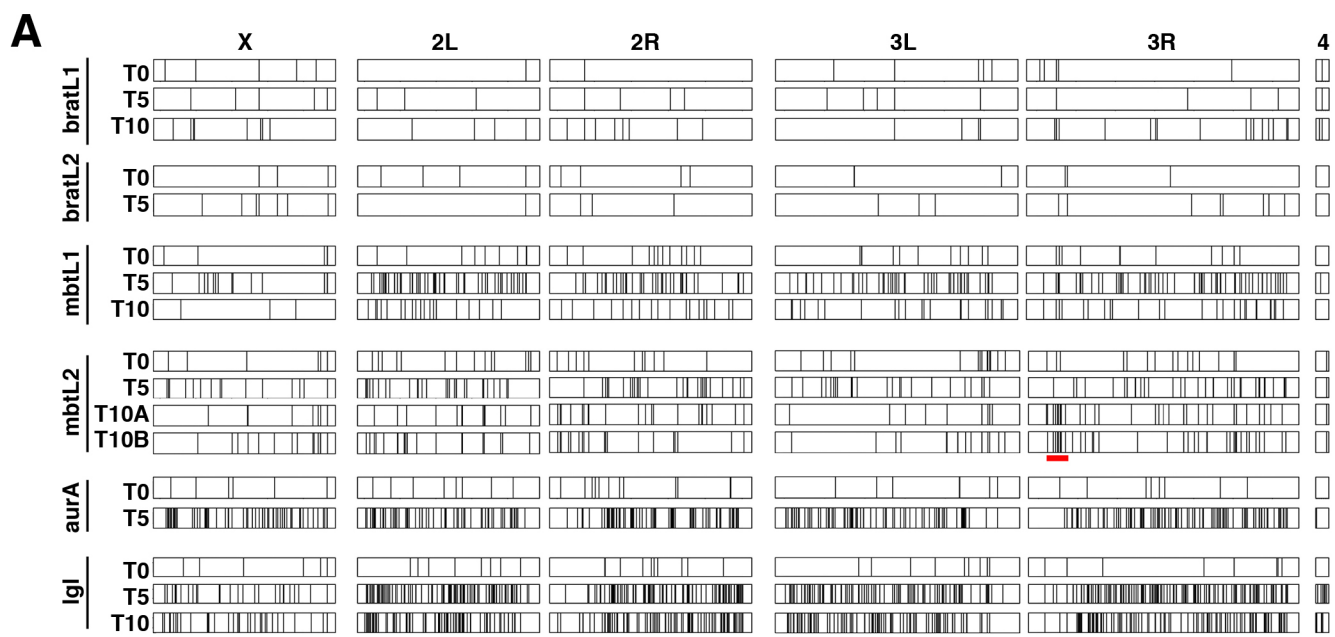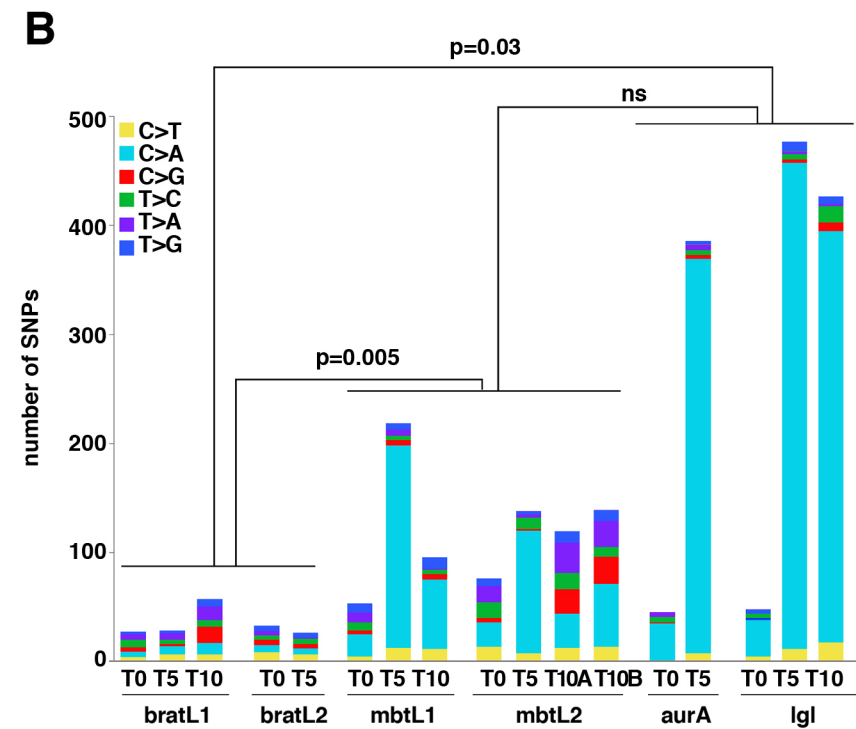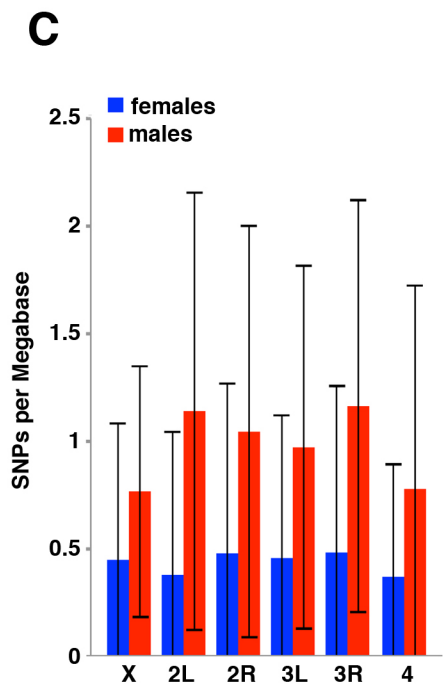

**FIGURE 4**

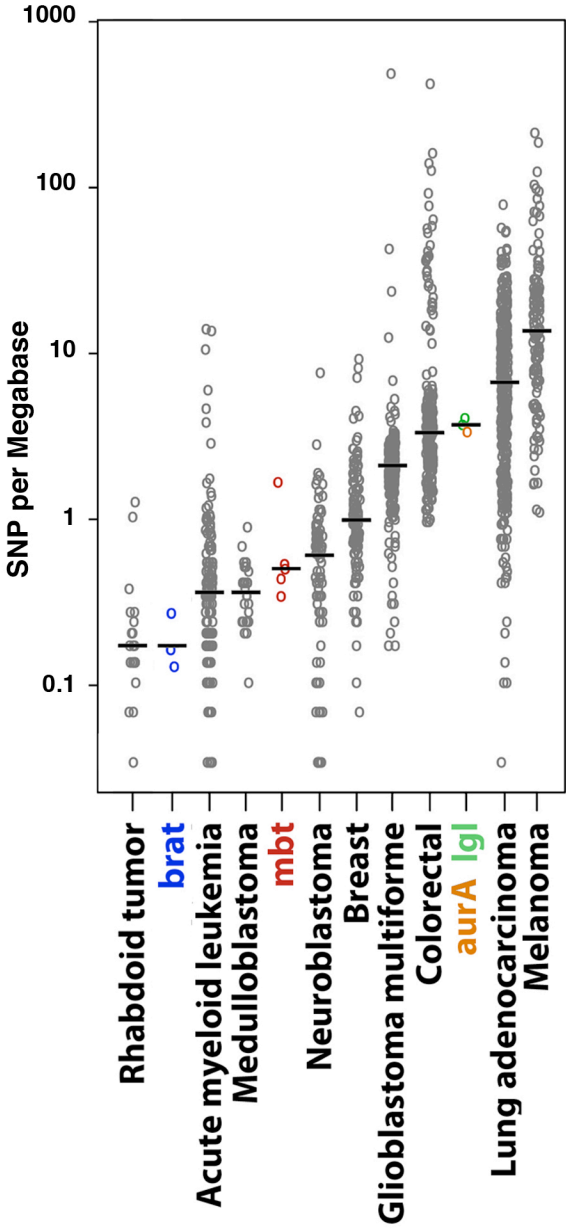

**Figure 5**

**A**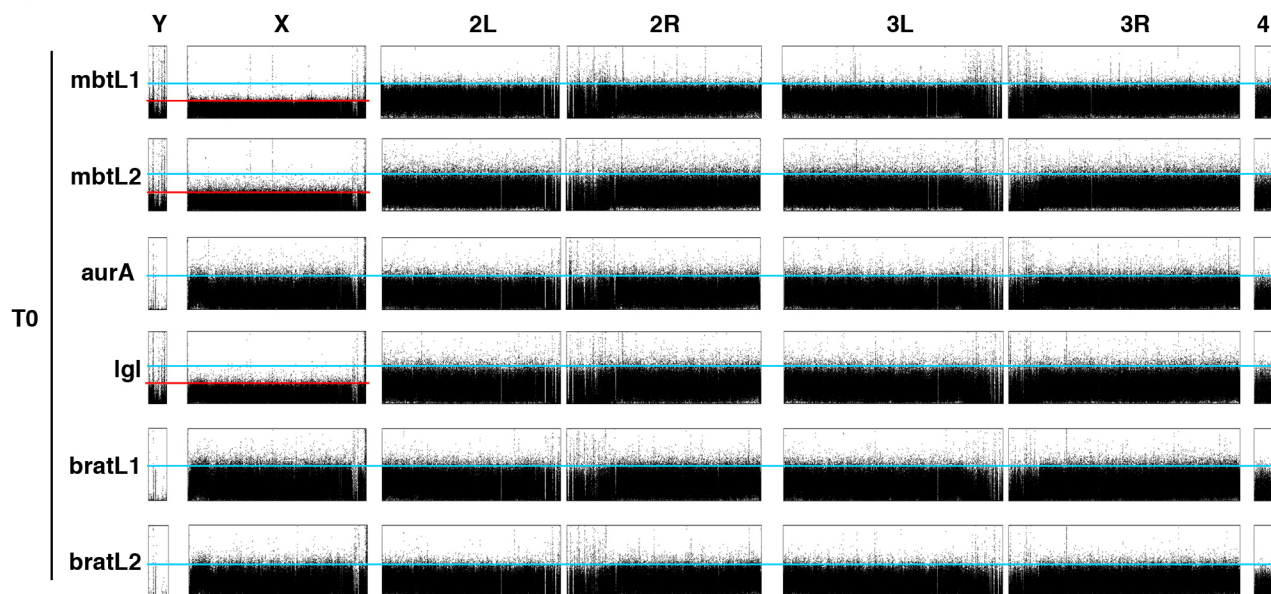**B**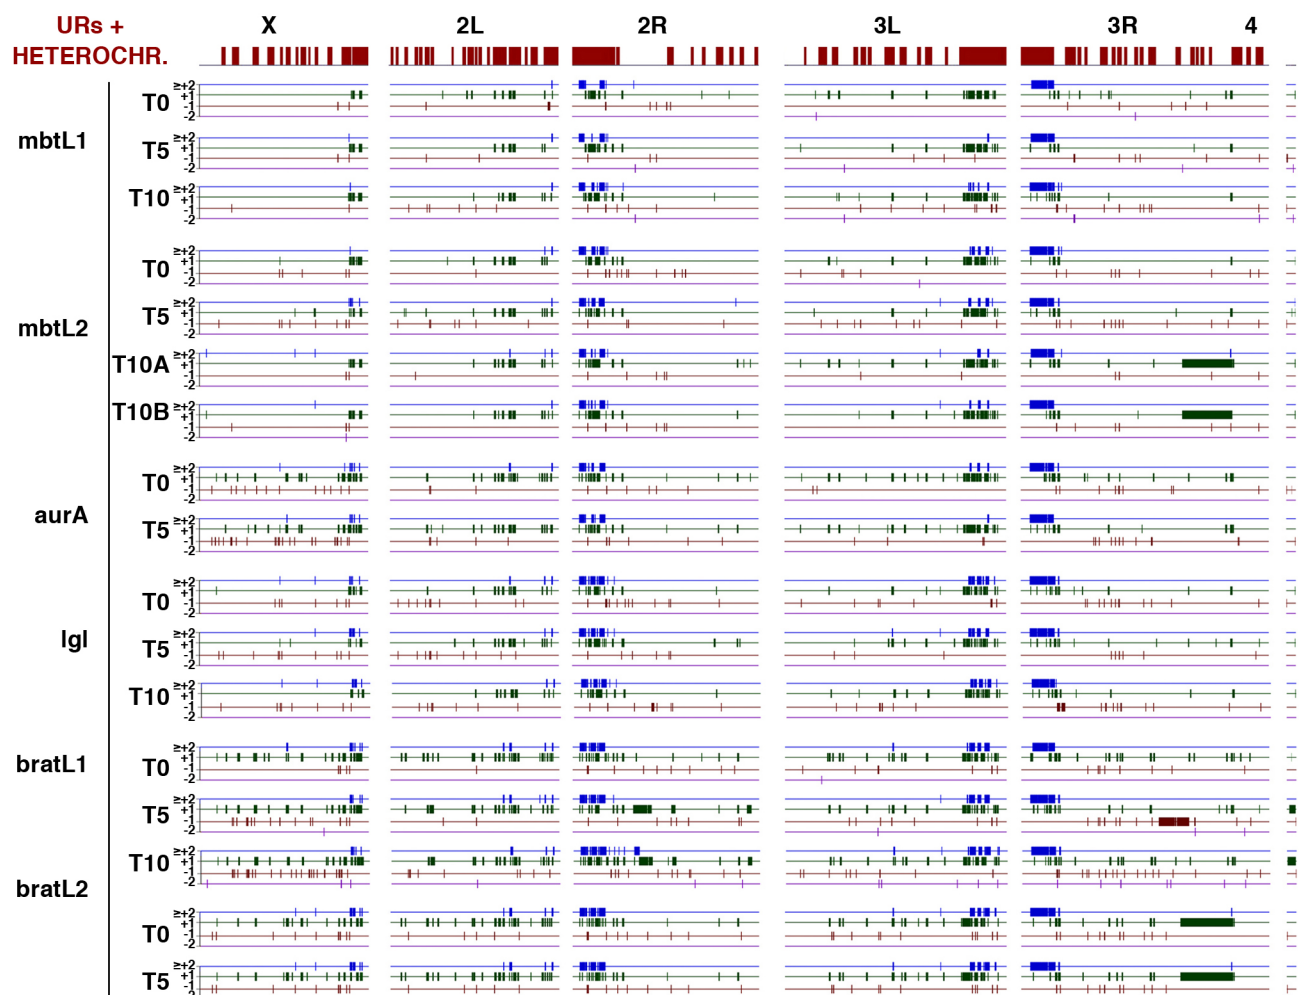**Figure S1**
